# Supplementary figures and images for: Adhesion Properties, Biofilm Forming Potential, and Susceptibility to Disinfectants of Contaminant Wine Yeasts
Source: MDPI journal article supplement (doi:10.3390/microorganisms9030654), 2021-03-22

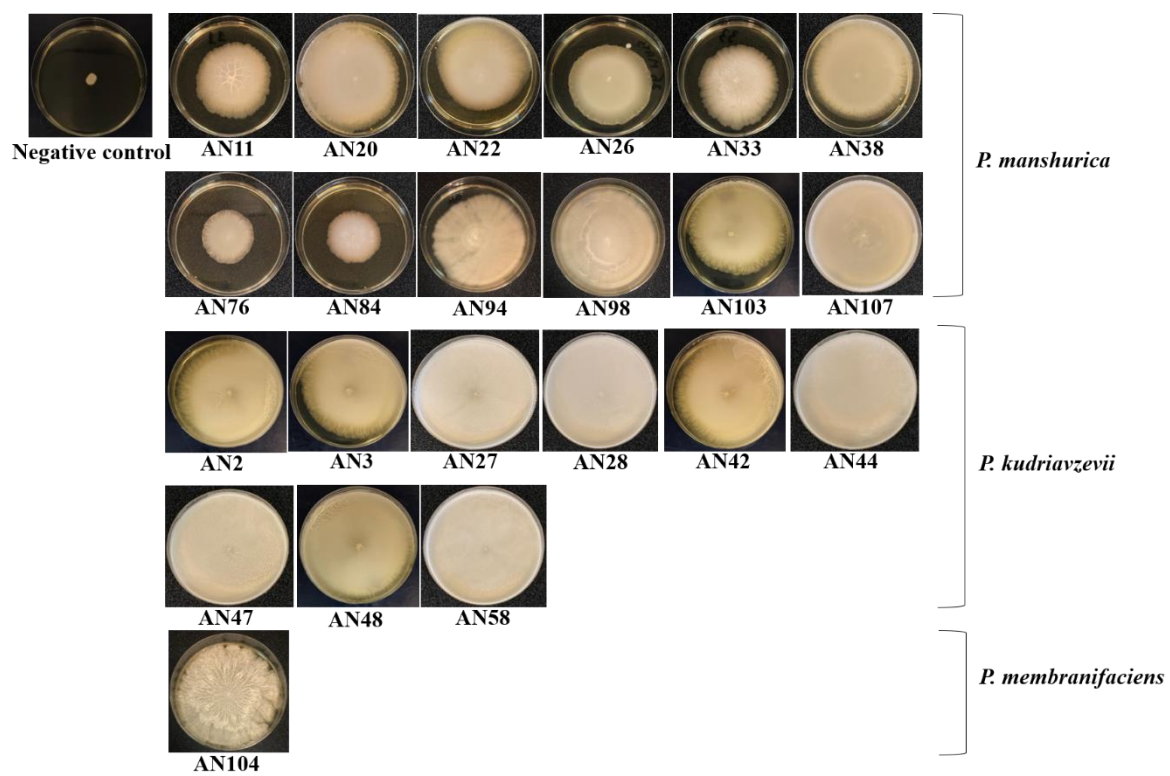

Figure S1

Supplement: s1 [file s1]
